# Supplementary material
Source: HighWire-hosted journal article supplement (https://diabetes.diabetesjournals.org/content/suppl/2004/11/23/53.12.3300)
Supplement: db0576OnlineAppendixFig2.pdf [file db0576OnlineAppendixFig2.pdf]

| Location | -14387 | -13058 | -8503 | -3318 | -1404 | 1074  | 2312  | 2351  | 2399  | 2949  | 4535  | 7808  | 10171 | 10476 | 11413 | 11845 | 20346 |
|----------|--------|--------|-------|-------|-------|-------|-------|-------|-------|-------|-------|-------|-------|-------|-------|-------|-------|
| -14387   |        | 0.982  | 0.803 | 0.823 | 0.609 | 0.092 | 0.117 | 0     | 0.117 | 0.123 | 0     | 0     | 0.817 | 1     | 0     | 1     | 0     |
| -13058   | 0.242  |        | 0.936 | 0.878 | 0.5   | 0.272 | 0     | 0.212 | 0     | 0     | 0     | 0.098 | 1     | 0     | 0.101 | 1     | 0.097 |
| -8503    | 0.255  | 0.562  |       | 0.991 | 0.849 | 0.253 | 0     | 0.234 | 0     | 0     | 0     | 0.105 | 0     | 0     | 0.098 | 0.897 | 0.089 |
| -3318    | 0.153  | 0.701  | 0.567 |       | 0.682 | 0.245 | 0     | 0.202 | 0     | 0     | 0     | 0.175 | 0.995 | 0     | 0.159 | 0.999 | 0.168 |
| -1404    | 0.035  | 0.095  | 0.174 | 0.192 |       | 0.518 | 0.376 | 0.536 | 0.376 | 0.371 | 0.309 | 0.345 | 0     | 0     | 0.338 | 0     | 0.346 |
| 1074     | 0.006  | 0.014  | 0.018 | 0.01  | 0.019 |       | 0.959 | 0.956 | 0.979 | 0.957 | 0     | 0.876 | 0.531 | 0     | 0.877 | 0.769 | 0.864 |
| 2312     | 0.009  | 0      | 0     | 0     | 0.041 | 0.225 |       | 0.942 | 1     | 0.994 | 0.858 | 0.847 | 0.858 | 0     | 0.861 | 0.902 | 0.831 |
| 2351     | 0      | 0.009  | 0.016 | 0.007 | 0.02  | 0.9   | 0.217 |       | 0.98  | 0.959 | 0     | 0.866 | 0.561 | 0     | 0.867 | 0.79  | 0.856 |
| 2399     | 0.009  | 0      | 0     | 0     | 0.041 | 0.226 | 0.973 | 0.228 |       | 0.983 | 0.862 | 0.885 | 0.809 | 0     | 0.887 | 0.866 | 0.871 |
| 2949     | 0.011  | 0      | 0     | 0     | 0.041 | 0.212 | 0.95  | 0.214 | 0.966 |       | 0.859 | 0.886 | 0.947 | 0     | 0.893 | 0.985 | 0.869 |
| 4535     | 0      | 0      | 0     | 0     | 0.017 | 0     | 0.467 | 0     | 0.457 | 0.448 |       | 0.55  | 0.666 | 0     | 0.571 | 1     | 0.538 |
| 7808     | 0      | 0.005  | 0.01  | 0.016 | 0.026 | 0.252 | 0.549 | 0.245 | 0.571 | 0.579 | 0.249 |       | 0.652 | 0     | 0.984 | 1     | 0.973 |
| 10171    | 0.025  | 0.01   | 0     | 0.009 | 0     | 0.014 | 0.009 | 0.016 | 0.008 | 0.011 | 0.007 | 0.007 |       | 0     | 0.65  | 1     | 0.658 |
| 10476    | 0.006  | 0      | 0     | 0     | 0     | 0     | 0     | 0     | 0     | 0     | 0     | 0     | 0     |       | 0     | 0     | 0     |
| 11413    | 0      | 0.006  | 0.009 | 0.013 | 0.024 | 0.25  | 0.562 | 0.246 | 0.581 | 0.586 | 0.268 | 0.968 | 0.007 | 0     |       | 1     | 0.984 |
| 11845    | 0.026  | 0.007  | 0.009 | 0.006 | 0     | 0.019 | 0.007 | 0.022 | 0.006 | 0.008 | 0.011 | 0.012 | 0.686 | 0     | 0.012 |       | 1     |
| 20346    | 0      | 0.005  | 0.007 | 0.015 | 0.026 | 0.246 | 0.513 | 0.244 | 0.543 | 0.541 | 0.243 | 0.926 | 0.007 | 0     | 0.948 | 0.012 |       |

| Key      |
|----------|
| 1.0      |
| 0.8-0.99 |
| 0.6-0.8  |
| 0.4-0.6  |
| 0.2-0.4  |
| <0.2     |
